# Supplementary material for: Tangent screen perimetry in the evaluation of visual field defects associated with ptosis and dermatochalasis
Source: PLoS One. 2017 Mar 29;12(3):e0174607. doi: 10.1371/journal.pone.0174607 (PMC5371337; doi:10.1371/journal.pone.0174607)
Supplement: S1 Supporting information — (XLSX) [file pone.0174607.s001.xlsx]

## Sheet: Included pt data
Study ID#	Diagnosis	Affected Side	Surgery done (1=BLEPH, 2=PTOSIS, 3=both)	Other surg? S=simultaneous	First Survey Complete	Initial VA OD	Initial VA OS	preop MRD1 OD	preop MRD1 OS	postop MRD1 OD	postop MRD1 OS
1	Dermatochalasis	OU	1	No	x	20	20	3	3	4	4
3	Dermatochalasis	OU	1	Bil Brow lift 2nd	x	20	20	1	1	2	2 (pre brow lift)
6	Dermatochalasis	OU	1	No	x	20	20	4	3.5
7	Dermatochalasis	OU	1	No	x	20	20	3.5	3.5	5	5
9	Dermatochalasis	OU	1	No	x	20	20	2.5	2.75	4	4
11	Ptosis	OU	2	No (had Bil internal)	x	20	20	0.5	0.5	4	4.5
12	Ptosis + Dermatochalasis	OD +OU	1 + 3	had RUL external ptosis rep + Bil bleph (h/o R scleral buckle and strab surgery)	x	60 (later 30)	20	1	-2	3	2
13	Dermatochalasis	OU	1	No	x	20	40	3	2.75	2	1
14	Dermatochalasis	OU	1	No	x	30	25	2	2	3.5	3
15	Ptosis	OD	2	No (external RUL)	x	25	20	0.25	2.5	3	3
16	Dermatochalasis	OU	1	No	x	20	20	3	2.75	5	4.5
17	Dermatochalasis	OU	1	Exci L lat brow lesion 5x10mm	x	20	40	2	1	3	3
18	Ptosis + Dermatochalasis	OU	3	No (external ptos + bleph)	x	25	20	1	1	3.5	3.5
19	Ptosis + Dermatochalasis	OU	3	No (external ptos + bleph)	x	20	20	0.5	0.5	3	3
20	Ptosis	OU	2	No (internal ptos)	x	75	30	0.25	0	4	4
22	Dermatochalasis	OU	1	No	x	25	25	2.5	2.5	4	4
25	Dermatochalasis	OU	1	No	x	20	20	2.5	3	3.5	3.5
27	Dermatochalasis	OU	1	No	x	40	20	2	1
28	Ptosis	OU	2	No	x	30	20	0.5	-1	3	3
29	Ptosis ?CPEO	OD	2	1) Right levator advancement with MRD1 of 2.5 mm and 2.5 mm of lag; 2) Biopsy of RUL orbic for h/o possible CPEO	x	20	20	0.5	3	4	4.5
30	Dermatochalasis	OU	1	No	x	40	30	3	2
31	Ptosis	OD	2	No	x	30	25	0	2	2	2
33	Dermatochalasis	OU	1	No	x	60 (PH20)	25 (PH20)	2	2	2	2
34	Ptosis (OPMD?)	OU	2	No	x	20	20	0	0.5	2.5	3
36	Dermatochalasis	OU	1	No	x	20	25	4	4	4	4
38	Dermatochalasis	OU	1	RLL lesion exc	x	20	25	0.5	1
39	Ptosis	OU	2	No (later had browlift and repeat LUL ptosis repair)	x	20	20	2	0	2	1.5
40	Ptosis	OU	2	LUL 1st 3/23/2012 RUL 2nd 7/27/2012	x	150 (RGP mono)	20	3.5	0.75	3	3
41	Dermatochalasis	OU	1	No	x	20	20	2.5	2.5	3	3
42	Ptosis	OU	2	No	x	70	20	-1	-1	3	3
43	Ptosis LUL, then RUL + Dermatochalasis BUL	OU	3	previous RUL ptosis repair 6/2011 (MRD1 -2/2)	x	20	20	2	0	4	4.5
48	Dermatochalasis	OU	1	No	x	25	30	1.5	1	2	3
52	Dermatochalasis	OU	1	1 Bilateral upper lid functional blepharoplasty 2. Bilateral 2.5 mm lateral canthal tendon tightening 3. Bilateral lower eyelid thermal punctal occlusion	x	25	20	3	3	3	2.75
71	Dermatochalasis	OU	1	No	x	30	25	0.5	0
92	Dermatochalasis	OU	1	No	x	30	50	4	4	4	4
99	Ptosis	OU	2	BLL LCTs	x	30	20	-3	-4	2.5	2.5
100	Ptosis + Dermatochalasis	OU	3	1) Bil ptosis + BULB 2) LUL ptosis repeat (9/18/13)	x	20	20	0.5	0.5	3	3
113	Ptosis	OU	2	No. external	x	20	25	0.5	1	2.5	2.5
117	Dermatochalasis	OU	1	No	x	20	20	2	2.5	3.5	3.5
120	Ptosis	OD	2	No (internal)	x	25	60	1	2.5	3.5	2.75
121	Ptosis + Dermatochalasis	OU	3	No (bleph + external)	x	20	20	1	1	2	2
123	Dermatochalasis	OU	1	No	x	25	20	3	3
126	Dermatochalasis	OU	1	No	x	25	20	3	3
127	Dermatochalasis	OU	1	Bil funtional bleph, bil canthal sparing, LCT tightening, bil LL Jones 1 snip w upper punctum dil	x	20	20	2.5	1.5	3	2
132	Dermatochalasis	OU	1	No	x	25	25	0	0
133	Dermatochalasis	OU	1	Bil bleph, Lesion excision	x	20	25	3	4.5	4	4
134	Ptosis	OS	2	No (LUL external ptos)	x	20	20	3.5	2	3	3
138	Dermatochalasis	OU	1	No	x	20	40	3	2.5	4	4
140	Dermatochalasis	OU	1	No	x	40	25	3.5	3.5	4	4
143	Dermatochalasis	OU	1	LL punctal occlusion	x	20	30	2	2
146	Ptosis	OU	2	No	x	20	30	-3	-3	2	2.25
152	Ptosis + Dermatochalasis	OU	3	No (bleph + external)	x	20	70 mono	0.5	0	4	3
			Surg type	patients	with #12
			1	30	31
			2	15	15
			3	6	7
				51	53

## Sheet: SVF
Study ID#	Eye	Pre MRD1	Post MRD1	Pre Pt Vertical Degrees	Pre Deg Area SVF	Pre Taped Vertical Degrees	Pre Taped Deg Area SVF	Post Vertical Degrees	Post Deg Area SVF	Comments	Surgery done (1=BLEPH, 2=PTOSIS, 3=both)	MRD1 increase	Taped to natural Vert SVF loss	Taped to natural % Vertical gain	Taped to natural SVF area loss	Taped to natural % Area gain	Pre to Post Vert increase	Pre to Post % increase vert SVF	Pre to Post Increase SVF area	Pre to Post % increase SVF area	Taped to Post Vert degrees	Taped to Post Area	AVERAGES		T-TEST
1	OD	3	4	17.1	385	28.9	1210	25.2	1044		1	1	11.8	40.8304	825	68.1818	8.1	47.3684	659	171.169	3.7	166	Pre MRD1 average	Post MRD1 average	Pre MRD1 to Post MRD1		Ave MRD1 change									Pre Pt Vertical Degrees	Mean	7.9697		Pre Taped Vertical Degrees	23.4122		t-Ratio	33.1052
1	OS	3	4	13.9	353	27.9	1141	25.2	1094		1	1	14	50.1792	788	69.0622	11.3	81.295	741	209.915	2.7	47	1.4899	3.2037	2.06839e-16		1.7963									Pre Pt Vertical Degrees	Std Dev	4.70255		Pre Pt Vertical Degrees	7.84694		DF	97
3	OD	1	2	14.6	322	25	898	13.6	450	later had brow lift	1	1	10.4	41.6	576	64.1425	-1	-6.84932	128	39.7516	11.4	448														Pre Pt Vertical Degrees	Std Err Mean	0.472624		Mean Difference	15.5653		Prob > |t|		<.0001
3	OS	1	2	13.8	308	22.5	804	10.5	353	later had brow lift	1	1	8.7	38.6667	496	61.6915	-3.3	-23.913	45	14.6104	12	451	VERTICAL DEGREES													Pre Pt Vertical Degrees	Upper 95% Mean	8.9076		Std Error	0.470178		Prob > t		<.0001
6	OD	4		8.5	233	25.9	988	4.3	45		1		17.4	67.1815	755	76.417	-4.2	-49.4118	-188	-80.6867	21.6	943	Pre Vertical deg average	Post Vertical deg average	Pre to Post Vertical degrees											Pre Pt Vertical Degrees	Lower 95% Mean	7.03179		Upper 95%	16.4985		Prob < t		1
6	OS	3.5		11.5	288	25.9	978	8.3	143		1		14.4	55.5985	690	70.5521	-3.2	-27.8261	-145	-50.3472	17.6	835	7.9697	21.5707	1.2879e-35											Pre Pt Vertical Degrees	N	99		Lower 95%	14.6321
7	OD	3.5	5	11.8	456	24.6	903	28.3	1106		1	1.5	12.8	52.0325	447	49.5017	16.5	139.831	650	142.544	-3.7	-203	4.70255	5.36105												Pre Taped Vertical Degrees	Mean	23.4122		N	98
7	OS	3.5	5	13.2	596	24.6	924	27.5	1128		1	1.5	11.4	46.3415	328	35.4978	14.3	108.333	532	89.2617	-2.9	-204	Pre Vertical deg average	Taped Vertical deg average	Pre to Taped Vertical degrees											Pre Taped Vertical Degrees	Std Dev	2.67417		Correlation	0.258937
9	OD	2.5	4	3	66	26.3	968	25.4	987		1	1.5	23.3	88.5932	902	93.1818	22.4	746.667	921	1395.45	0.9	-19	7.9697	23.4122	5.84313e-55											Pre Taped Vertical Degrees	Std Err Mean	0.270132
9	OS	2.75	4	2.6	100	25.2	981	25.4	995		1	1.25	22.6	89.6825	881	89.8063	22.8	876.923	895	895	-0.2	-14		2.67417												Pre Taped Vertical Degrees	Upper 95% Mean	23.9484		Post Vertical Degrees	21.4745		t-Ratio	19.2453
12	OS	1	2	8.5	259	21.5	864	5.7	201	Hering's	1	1	13	60.4651	605	70.0231	-2.8	-32.9412	-58	-22.3938	15.8	663	Max Diff Taped-Post	Aver diff Taped-Post	Taped to Post Vertical degrees											Pre Taped Vertical Degrees	Lower 95% Mean	22.8761		Pre Pt Vertical Degrees	7.84694		DF	97
13	OD	3	2	11.1	350	20.4	813	24.6	952		1	-1	9.3	45.5882	463	56.9496	13.5	121.622	602	172	-4.2	-139	21.6	1.93776	0.00134286											Pre Taped Vertical Degrees	N	98		Mean Difference	13.6276		Prob > |t|		<.0001
13	OS	2.75	1	9.2	298	23.5	910	24.6	961		1	-1.75	14.3	60.8511	612	67.2527	15.4	167.391	663	222.483	-1.1	-51	Min Taped-Post	Aver Post-Pre												Post Vertical Degrees	Mean	21.5707		Std Error	0.708097		Prob > t		<.0001
14	OD	2	3.5	15.9	579	26.7	1120	19.6	600		1	1.5	10.8	40.4494	541	48.3036	3.7	23.2704	21	3.62694	7.1	520	-9.3	13.601												Post Vertical Degrees	Std Dev	5.36105		Upper 95%	15.0329		Prob < t		1
14	OS	2	3	13	455	24.8	1039	20	605		1	1	11.8	47.5806	584	56.2079	7	53.8462	150	32.967	4.8	434														Post Vertical Degrees	Std Err Mean	0.538806		Lower 95%	12.2222
16	OD	3	5	10.7	355	22.8	880	23.9	841		1	2	12.1	53.0702	525	59.6591	13.2	123.364	486	136.901	-1.1	39														Post Vertical Degrees	Upper 95% Mean	22.6399		N	98
16	OS	2.75	4.5	13.2	355	24	936	22.1	740		1	1.75	10.8	45	581	62.0726	8.9	67.4242	385	108.451	1.9	196	GAIN													Post Vertical Degrees	Lower 95% Mean	20.5015		Correlation	-0.00395428
17	OD	2	3	2.1	89	24.1	901	23.1	818		1	1	22	91.2863	812	90.1221	21	1000	729	819.101	1	83	Vertical Taping gain average	Vertical Surgery gain average	Taping to Surgery Vertical gain	Pre op estimate vs post op actual										Post Vertical Degrees	N	99
17	OS	1	3	3.8	77	22.8	846	22.1	771		1	2	19	83.3333	769	90.8983	18.3	481.579	694	901.299	0.7	75	15.5653	13.601	0.00134286															Post Vertical Degrees	21.4745		t-Ratio	-3.30243
22	OD	2.5	4	8.9	159	25	960	14.3	589		1	1.5	16.1	64.4	801	83.4375	5.4	60.6742	430	270.44	10.7	371																		Pre Taped Vertical Degrees	23.4122		DF	97
22	OS	2.5	4	10.7	175	18.2	577	16.8	781		1	1.5	7.5	41.2088	402	69.6707	6.1	57.0093	606	346.286	1.4	-204	AREA													Pre Deg Area SVF	Mean	222.667		Mean Difference	-1.93776		Prob > |t|		0.0013
25	OD	2.5	3.5	8	248	21.2	842	21.2	892		1	1	13.2	62.2642	594	70.5463	13.2	165	644	259.677	0	-50	Pre Area average	Post Area average	Pre to Post Area	Pearson correlation										Pre Deg Area SVF	Std Dev	156.694		Std Error	0.586767		Prob > t		0.9993
25	OS	3	3.5	1.6	51	20.8	837	21.6	939		1	0.5	19.2	92.3077	786	93.9068	20	1250	888	1741.18	-0.8	-102	222.667	831.687	6.77779e-36	0.889733										Pre Deg Area SVF	Std Err Mean	15.7483		Upper 95%	-0.773186		Prob < t		0.0007
27	OD	2		11.9	373	24.4	975	25.2	962		1		12.5	51.2295	602	61.7436	13.3	111.765	589	157.909	-0.8	13	156.694	275.312												Pre Deg Area SVF	Upper 95% Mean	253.919		Lower 95%	-3.10232
27	OS	1		4.1	207	24.1	940	24.8	941		1		20	82.9876	733	77.9787	20.7	504.878	734	354.589	-0.7	-1	Pre Area average	Taped Area average	Pre to Taped Area											Pre Deg Area SVF	Lower 95% Mean	191.415		N	98
30	OD	3		16.3	398	26.7	1018	20.6	780		1		10.4	38.9513	620	60.9037	4.3	26.3804	382	95.9799	6.1	238	222.667	912.582	7.92823e-63											Pre Deg Area SVF	N	99		Correlation	0.0536538
30	OS	2		13.7	373	24.4	952	24.6	932		1		10.7	43.8525	579	60.8193	10.9	79.562	559	149.866	-0.2	20		144.15												Pre Taped Deg Area SVF	Mean	912.582
33	OD	2	2	2.5	54	22.1	757	17.7	603		1	0	19.6	88.6878	703	92.8666	15.2	608	549	1016.67	4.4	154	Max Diff Taped-Post	Aver diff Taped-Post	Taped to Post Area											Pre Taped Deg Area SVF	Std Dev	144.15
33	OS	2	2	6.7	168	21.3	872	23.9	937		1	0	14.6	68.5446	704	80.7339	17.2	256.716	769	457.738	-2.6	-65	943	87.7551	0.00596914											Pre Taped Deg Area SVF	Std Err Mean	14.5614
36	OD	4	4	2.7	147	21.5	924	22.6	846		1	0	18.8	87.4419	777	84.0909	19.9	737.037	699	475.51	-1.1	78		Aver Post-Pre												Pre Taped Deg Area SVF	Upper 95% Mean	941.482		Prob > |t| = .0001 represents the p-value for HA: µY - µN ≠ 0						2 tailed T-test
36	OS	4	4	7.3	144	23.8	966	23	819		1	0	16.5	69.3277	822	85.0932	15.7	215.068	675	468.75	0.8	147		609.02												Pre Taped Deg Area SVF	Lower 95% Mean	883.681		Prob > t = .0001 represents the p-value for HA: µY - µN > 0						1 tailed where Y>X
38	OD	0.5		4.1	116	25.9	1040	21.3	627		1		21.8	84.1699	924	88.8462	17.2	419.512	511	440.517	4.6	413														Pre Taped Deg Area SVF	N	98		Prob < t = 1.000 represents the p-value for HA: µY - µN < 0						1 tailed where Y<X
38	OS	1		2.8	61	25.5	1031	23	777		1		22.7	89.0196	970	94.0834	20.2	721.429	716	1173.77	2.5	254	GAIN													Post Deg Area SVF	Mean	831.687
41	OD	2.5	3	4.8	216	24.1	950	24	956		1	0.5	19.3	80.083	734	77.2632	19.2	400	740	342.593	0.1	-6	Area Taping Gain average	Area Surgery gain average	Taping to Surgery Area gain											Post Deg Area SVF	Std Dev	275.312		1. Upper CL Dif and Lower CL Dif give the 95% CI for the true difference. Since the 95% CI contains zero, conclude that there is not a significant difference between the means. 2. Prob > |t| is the p-­‐value for the two-­‐tailed test. The null hypothesis is that means are equal (the mean difference is zero). Since the Prob > |t| is greater than 0.05, cannot reject the null hypothesis (i.e., we ca…
41	OS	2.5	3	6.7	275	24.1	961	5.3	112	due to brow	1	0.5	17.4	72.1992	686	71.384	-1.4	-20.8955	-163	-59.2727	18.8	849	697.122	609.02	0.00596914											Post Deg Area SVF	Std Err Mean	27.6699
48	OD	1.5	2	5	110	27.3	1066	17.1	753		1	0.5	22.3	81.685	956	89.6811	12.1	242	643	584.545	10.2	313														Post Deg Area SVF	Upper 95% Mean	886.597
48	OS	1	3	9	233	25.7	992	22.9	1021		1	2	16.7	64.9805	759	76.5121	13.9	154.444	788	338.197	2.8	-29														Post Deg Area SVF	Lower 95% Mean	776.777
52	OD	3	3	0.6	6	22.6	793	17.6	598	due to brow	1	0	22	97.3451	787	99.2434	17	2833.33	592	9866.67	5	195														Post Deg Area SVF	N	99
52	OS	3	2.75	0.6	9	22.9	805	17.4	620	due to brow	1	-0.25	22.3	97.3799	796	98.882	16.8	2800	611	6788.89	5.5	185
71	OD	0.5		6.3	123	24.6	1049	22.2	859		1		18.3	74.3902	926	88.2745	15.9	252.381	736	598.374	2.4	190
71	OS	0		6	167	24.9	1028	23.4	872		1		18.9	75.9036	861	83.7549	17.4	290	705	422.156	1.5	156	# eyes bleph	61
92	OD	4	4	12.6	336	21.4	926	19.7	654		1	0	8.8	41.1215	590	63.7149	7.1	56.3492	318	94.6429	1.7	272	# eyes ptosis	25
92	OS	4	4	14.6	452	25.1	1013	22.3	704		1	0	10.5	41.8327	561	55.3801	7.7	52.7397	252	55.7522	2.8	309	# eyes both	13
117	OD	2	3.5	10	246	25.3	1038	28.6	1286		1	1.5	15.3	60.4743	792	76.3006	18.6	186	1040	422.764	-3.3	-248
117	OS	2.5	3.5	11.1	255	25.1	1025	26.8	1310		1	1	14	55.7769	770	75.122	15.7	141.441	1055	413.725	-1.7	-285
123	OD	3		7.5	222	24.5	1004	17.9	597		1		17	69.3878	782	77.8884	10.4	138.667	375	168.919	6.6	407
123	OS	3		12.6	387	25.7	1041	14.5	494		1		13.1	50.9728	654	62.8242	1.9	15.0794	107	27.6486	11.2	547
126	OD	3		12.7	449	25.2	990	12.2	332		1		12.5	49.6032	541	54.6465	-0.5	-3.93701	-117	-26.0579	13	658
126	OS	3		12.8	356	24	995	17.8	442		1		11.2	46.6667	639	64.2211	5	39.0625	86	24.1573	6.2	553
127	OD	2.5	3	5	176	23.9	1061	24.5	891		1	0.5	18.9	79.0795	885	83.4119	19.5	390	715	406.25	-0.6	170
127	OS	1.5	2	5	135	25	1048	23.8	1000		1	0.5	20	80	913	87.1183	18.8	376	865	640.741	1.2	48
132	OD	0		1	1	25.3	1030	17.9	856		1		24.3	96.0474	1029	99.9029	16.9	1690	855	85500	7.4	174
132	OS	0		3.3	149	25.1	1052	20.3	889		1		21.8	86.8526	903	85.8365	17	515.152	740	496.644	4.8	163
133	OD	3	4	1.7	13	25.6	964	24.8	951		1	1	23.9	93.3594	951	98.6515	23.1	1358.82	938	7215.38	0.8	13
133	OS	4.5	4	2.3	20	24.9	944	25.6	974		1	-0.5	22.6	90.7631	924	97.8814	23.3	1013.04	954	4770	-0.7	-30														By surgical subgroup	Excel	JMP
138	OD	3	4	9.5	207	24.8	916	22.2	859		1	1	15.3	61.6935	709	77.4017	12.7	133.684	652	314.976	2.6	57														r=correlation bleph	0.897803	0.9
138	OS	2.5	4	2	16	25.5	1000	25.7	1000		1	1.5	23.5	92.1569	984	98.4	23.7	1185	984	6150	-0.2	0														r=correlation ptosis	0.861475	0.86
140	OD	3.5	4	3.4	36	13.1	285	18.8	881		1	0.5	9.7	74.0458	249	87.3684	15.4	452.941	845	2347.22	-5.7	-596														r=correlation both	0.870718	0.87
140	OS	3.5	4	6.7	91	17.3	520	23.1	959		1	0.5	10.6	61.2717	429	82.5	16.4	244.776	868	953.846	-5.8	-439
143	OD	2		3.5	240	22.2	887	31.5	1343		1		18.7	84.2342	647	72.9425	28	800	1103	459.583	-9.3	-456
143	OS	2		2.2	75	23.5	942	28.8	1199		1		21.3	90.6383	867	92.0382	26.6	1209.09	1124	1498.67	-5.3	-257
11	OD	0.5	4	6.9	90	20.8	708	26.1	1017		2	3.5	13.9	66.8269	618	87.2881	19.2	278.261	927	1030	-5.3	-309
11	OS	0.5	4.5	8.9	132	23.3	807	24.3	932		2	4	14.4	61.8026	675	83.6431	15.4	173.034	800	606.061	-1	-125
15	OD	0.25	3	8.5	276	26.3	994	24.1	777		2	2.75	17.8	67.6806	718	72.2334	15.6	183.529	501	181.522	2.2	217
20	OD	0.25	4	12.2	249	24.4	845	24.6	893		2	3.75	12.2	50	596	70.5325	12.4	101.639	644	258.635	-0.2	-48
20	OS	0	4	14.4	309	24.8	942	24.2	892		2	4	10.4	41.9355	633	67.1975	9.8	68.0556	583	188.673	0.6	50
28	OD	0.5	3	18.1	458	25.2	876	25.7	971		2	2.5	7.1	28.1746	418	47.7169	7.6	41.989	513	112.009	-0.5	-95
28	OS	-1	3	7.4	305	24.8	1025	26	1007		2	4	17.4	70.1613	720	70.2439	18.6	251.351	702	230.164	-1.2	18
29	OD	0.5	4	12.5	262	23.9	892	24.1	906	OD only w orbic bx	2	3.5	11.4	47.6987	630	70.6278	11.6	92.8	644	245.802	-0.2	-14
31	OD	0	2	5.6	137	17	708	21.8	874	OD only	2	2	11.4	67.0588	571	80.6497	16.2	289.286	737	537.956	-4.8	-166
34	OD	0	2.5	7.9	283	21.5	824	16.8	781		2	2.5	13.6	63.2558	541	65.6553	8.9	112.658	498	175.972	4.7	43						r=correlation	0.870436
34	OS	0.5	3	8.2	181	20.8	834	20.6	882		2	2.5	12.6	60.5769	653	78.2974	12.4	151.22	701	387.293	0.2	-48
39	OD	2	2	2.5	136	22.1	946	10.3	298		2	0	19.6	88.6878	810	85.6237	7.8	312	162	119.118	11.8	648
39	OS	0	1.5	1.4	48	22.9	1042	10.3	146		2	1.5	21.5	93.8865	994	95.3935	8.9	635.714	98	204.167	12.6	896
40	OD	2	3	11.5	287	22.2	789	24.4	954		2	1	10.7	48.1982	502	63.6248	12.9	112.174	667	232.404	-2.2	-165
40	OS	0.75	3	11.1	321	21.5	912	24.8	959		2	2.25	10.4	48.3721	591	64.8026	13.7	123.423	638	198.754	-3.3	-47
42	OD	-1	3	4.8	99	20	917	23.3	991		2	4	15.2	76	818	89.2039	18.5	385.417	892	901.01	-3.3	-74
42	OS	-1	3	7.2	99	20	968	22.1	974		2	4	12.8	64	869	89.7727	14.9	206.944	875	883.838	-2.1	-6
99	OD	-3	2.5	1.4	9	23.7	941	22	850		2	5.5	22.3	94.0928	932	99.0436	20.6	1471.43	841	9344.44	1.7	91
99	OS	-4	2.5	1.7	11	23.7	906	20.8	718		2	6.5	22	92.827	895	98.7859	19.1	1123.53	707	6427.27	2.9	188
113	OD	0.5	2.5	12.4	425	22.7	908	23.3	946		2	2	10.3	45.3744	483	53.1938	10.9	87.9032	521	122.588	-0.6	-38
113	OS	1	2.5	9.6	380	22.9	937	13.8	340	mistake on TVF or Hering's?	2	1.5	13.3	58.0786	557	59.445	4.2	43.75	-40	-10.5263	9.1	597
120	OD	1	3.5	9.5	214	27.2	1035	25.2	901		2	2.5	17.7	65.0735	821	79.3237	15.7	165.263	687	321.028	2	134
134	OS	2	3	14.2	271	18.4	502	23.8	1067		2	1	4.2	22.8261	231	46.0159	9.6	67.6056	796	293.727	-5.4	-565
146	OD	-3	2	2.3	19	23.9	846	20.9	961		2	5	21.6	90.3766	827	97.7541	18.6	808.696	942	4957.89	3	-115
146	OS	-3	2.25	2	41	22.6	868	24.6	1037		2	5.25	20.6	91.1504	827	95.2765	22.6	1130	996	2429.27	-2	-169
12	OD	-2	3	0.4	13	20	826	20.7	688	RUL ptosis BULB	3	5	19.6	98	813	98.4262	20.3	5075	675	5192.31	-0.7	138						MRD1change vs SVF change				Pre MRD1 vs Pre SVF
18	OD	1	3.5	7.9	151	19.6	624	23	691		3	2.5	11.7	59.6939	473	75.8013	15.1	191.139	540	357.616	-3.4	-67							VertSVF	SVF Area			VertSVF	SVF Area
18	OS	1	3.5	7.5	106	22.9	702	24.3	876		3	2.5	15.4	67.2489	596	84.9003	16.8	224	770	726.415	-1.4	-174						r=correlation	0.238428	0.282359		r=correlation	0.240398	0.251883
19	OD	0.5	3	13.3	292	25.6	950	27.1	1196		3	2.5	12.3	48.0469	658	69.2632	13.8	103.759	904	309.589	-1.5	-246
19	OS	0.5	3	11.9	230	25.9	997	27.1	1123		3	2.5	14	54.0541	767	76.9308	15.2	127.731	893	388.261	-1.2	-126						MRD1 change	VertSVF	SVFArea			VertSVF	SVF Area										MRD1 change to VertSVF change
43	OD	1	4	20	929			31	1504	previous RUL repair, after LUL repair, herings on right	3	3					11	55	575	61.8945								bleph	0.226346	0.273468		bleph	0.234805	0.253941										r=correlation	from JMP
43	OS	0	4.5	3.7	158	25.3	1042	31	1531		3	4.5	21.6	85.3755	884	84.8369	27.3	737.838	1373	868.987	-5.7	-489						ptosis	0.232906	0.284751		ptosis	0.212463											bleph	-0.13
100	OD	0.5	3	6.9	174	22.4	932	22.9	895		3	2.5	15.5	69.1964	758	81.3305	16	231.884	721	414.368	-0.5	37						both	0.231626	0.282509		both												ptosis	0.73
100	OS	0.5	3	8.4	333	22.2	923	23.1	903		3	2.5	13.8	62.1622	590	63.922	14.7	175	570	171.171	-0.9	20										DIDN'T WORK IN EXCEL WITH "FILTER"												both	0.74
121	OD	1	2	10	406	24.4	1057	22.2	872		3	1	14.4	59.0164	651	61.5894	12.2	122	466	114.778	2.2	185																									Correlation	Count	Lower 95% CI
121	OS	1	2	10	305	24.9	1061	14.4	581		3	1	14.9	59.8394	756	71.2535	4.4	44	276	90.4918	10.5	480																					bleph	1	Pre to Post Vert increase	MRD1 increase	-0.1222	43	-0.4076
152	OD	0.5	4	8.7	256	19.4	708	21.7	883		3	3.5	10.7	55.1546	452	63.8418	13	149.425	627	244.922	-2.3	-175																					ptosis	2	Pre to Post Vert increase	MRD1 increase	0.731	25	0.4722
152	OS	0	3	0.8	50	14.2	519	22.4	849		3	3	13.4	94.3662	469	90.3661	21.6	2700	799	1598	-8.2	-330																					both	3	Pre to Post Vert increase	MRD1 increase	0.742	13	0.3232
										6 eyelids with lower than expected post op VF and post op MRD1<2.5 mm
OD:	51
OS:	48
[truncated: 10 more columns]

## Sheet: No postTVF
Study ID#	Eye	Pre MRD1	Post MRD1	Pre Pt Vertical Degrees	Pre Deg Area SVF	Pre Taped Vertical Degrees	Pre Taped Deg Area SVF	Post Vertical Degrees	Post Deg Area SVF	Comments	Surgery done (1=BLEPH, 2=PTOSIS, 3=both)	MRD1 increase	Taped to natural Vert SVF loss	Taped to natural % Vertical gain	Taped to natural SVF area loss	Taped to natural % Area gain	Pre to Post Vert increase	Pre to Post % increase vert SVF	Pre to Post Increase SVF area	Pre to Post % increase SVF area	Taped to Post Vert degrees	Taped to Post Area
5	OD	0	3.5	7.3	156	23.3	870				3	3.5	16	68.6695	714	82.069
5	OS	0	3.5	8	202	24	834			pre LUL repeat for residual ptosis, also had a LL bleph, LCTT	3	3.5	16	66.6667	632	75.7794
8	OD	3.5		3.2	216	21.4	923				1		18.2	85.0467	707	76.598
8	OS	3.5		11.8	400	22.5	950				1		10.7	47.5556	550	57.8947
21	OS	3	5	15.6	355	26.7	979			OS only	2	2	11.1	41.573	624	63.7385
23	OD	0.5		8.1	271	24.8	1061				1		16.7	67.3387	790	74.4581
23	OS	0		2.6	136	24.8	1022				1		22.2	89.5161	886	86.6928
24	OS	2	3	11.9	253	24.4	922			OS only	2	1	12.5	51.2295	669	72.5597
26	OD	4	4	3.8	113	25.4	970				1	0	21.6	85.0394	857	88.3505
26	OS	3	3.5	5	142	25	952				1	0.5	20	80	810	85.084
32	OD	-2	1	3	125	22.2	755				3	3	19.2	86.4865	630	83.4437
32	OS	-2	1.5	8.9	232	21.9	868				3	3.5	13	59.3607	636	73.2719
35	OD	0.25		6.7	161	25.2	989				2		18.5	73.4127	828	83.7209
35	OS	0		2.6	56	21.5	910				2		18.9	87.907	854	93.8462
64	OD	1.5	2	3.7	192	25.4	974				1	0.5	21.7	85.4331	782	80.2875
64	OS	1	2	11.4	375	25.4	1016				1	1	14	55.1181	641	63.0906
69	OD	3	2	1.7	26	25.1	996				1	-1	23.4	93.2271	970	97.3896
69	OS	3	2.25	3.4	43	26	1001				1	-0.75	22.6	86.9231	958	95.7043
75	OD			8.6	159	25.1	958			sch for f/u on 1/22/14	2
75	OS			4	48	24.9	948				2

## Sheet: TVF Times
OD	OD formatted 00:00:00	OS	OS formatted 00:00:00	OD+OS	Average OD	Average OS	Average ODorOS	Average OU	MIN one eye	MAX one eye	median one eye	St dev one eye	CI one eye	CI in one eye
2	0:02:00	2.26	0:02:26	0:04:26	0:03:22.241000	0:03:00.946000	0:03:11.400000	0:06:22.846000	0:00:46	0:08:52	0:02:31.500000	1.75282	1.07377	64.2	04:15:00	02:07:00
1.2	0:01:20	1.35	0:01:35	0:02:55			StDEV	0:03:28.322000				5.52139		sec
5.01	0:05:01	3.58	0:03:58	0:08:59			0:03:28.322000		MIN two eyes	MAX two eyes	Median two eyes
2	0:02:00	2.35	0:02:35	0:04:35					0:01:58	0:17:41	0:05:04
2.22	0:02:22	2.3	0:02:30	0:04:52
		3.25	0:03:25
5.53	0:05:53	4.25	0:04:25	0:10:18				Time	SD			CI	CI in seconds
2	0:02:00	2.25	0:02:25	0:04:25			Tangent	0:06:22.846000	0:03:28.322000	3.47	6.23	0.966054	57.9633	07:21:00	05:25:00
1.3	0:01:30	1.2	0:01:20	0:02:50			Goldmann	0:12:10	0:02:54	2.9	12.1
2.44	0:02:44	2	0:02:00	0:04:44			Humphrey	0:18:50	0:03:48	3.8	18.5
1.2	0:01:20	2.32	0:02:32	0:03:52
3	0:03:00	2.4	0:02:40	0:05:40			Tangent Goldmann Humphrey
1.34	0:01:34	1.43	0:01:43	0:03:17
4.45	0:04:45	5.45	0:05:45	0:10:30
1.3	0:01:30	2	0:02:00	0:03:30
1.2	0:01:20	1.17	0:01:17	0:02:37
4	0:04:00	3.32	0:03:32	0:07:32
1.37	0:01:37	2.31	0:02:31	0:04:08
1.35	0:01:35	1.2	0:01:20	0:02:55
		2.2	0:02:20
3.21	0:03:21	1.55	0:01:55	0:05:16
5.2	0:05:20	4.05	0:04:05	0:09:25
1.46	0:01:46	0.46	0:00:46	0:02:32
3.27	0:03:27	2.24	0:02:24	0:05:51
3.2	0:03:20	2.58	0:02:58	0:06:18
6.36	0:06:36	5.16	0:05:16	0:11:52
5.36	0:05:36	4.52	0:04:52	0:10:28
0.56	0:00:56	1.02	0:01:02	0:01:58
5.36	0:05:36	5.09	0:05:09	0:10:45
3	0:03:00	3.15	0:03:15	0:06:15
4.26	0:04:26	3	0:03:00	0:07:26
2.23	0:02:23	1.2	0:01:20	0:03:43
5.13	0:05:13	4.15	0:04:15	0:09:28
8.49	0:08:49	8.52	0:08:52	0:17:41
		3.2	0:03:20
1.2	0:01:20	1.18	0:01:18	0:02:38
1.4	0:01:40	1.55	0:01:55	0:03:35
1.3	0:01:30
6.25	0:06:25
0.55	0:00:55	1.06	0:01:06	0:02:01
2.12	0:02:12	2.1	0:02:10	0:04:22
2.45	0:02:45	2.05	0:02:05	0:04:50
5	0:05:00	4.49	0:04:49	0:09:49
3.22	0:03:22	1.56	0:01:56	0:05:18
4.29	0:04:29	4.36	0:04:36	0:09:05
5.17	0:05:17	4.34	0:04:34	0:09:51
2	0:02:00	2.04	0:02:04	0:04:04
2.1	0:02:10	2.11	0:02:11	0:04:21
2	0:02:00	1.3	0:01:30	0:03:30
2.09	0:02:09	2.08	0:02:08	0:04:17
5.33	0:05:33	5.21	0:05:21	0:10:54
7.42	0:07:42	5.34	0:05:34	0:13:16
4.1	0:04:10	2.38	0:02:38	0:06:48
6.08	0:06:08	4.48	0:04:48	0:10:56
		2.06	0:02:06
2.24	0:02:24	2	0:02:00	0:04:24
3.08	0:03:08	2.1	0:02:10	0:05:18
4.22	0:04:22	7.06	0:07:06	0:11:28

## Sheet: Costs
Costs	250	300	13000	26000
The Goldmann - no longer made. Have Haag Streit Automated VF that does kinetic testing.
The HS 600 is around $16,000.00 but it only goes out about 50 degrees. The rep said most people use the HS 900 which is $26,000.00 to $31,000.00.
Tangent screen is $250.00
GVF refurbished is $300

## Sheet: MRD1 change
From JMP						Surgery done (1=BLEPH, 2=PTOSIS, 3=both)	ID#	Eye	pre 1=Bleph	post 1=Bleph	Diff	Pre 2=Ptosis	Post 2=Ptosis	Diff	Pre 3=both	Post 3=Both	Diff			Bleph	Ptosis	Both
Post MRD1	3.36628	t-Ratio	6.13215		Blepharoplasty	1	1	OD	3	4	1								PreMRD1	2.38934	-0.15	0.423077
Pre MRD1	2.61047	DF	42			1	1	OS	3	4	1								StDev	1.08159	1.60241	0.812562
Mean Difference	0.755814	Prob > |t|		<.0001		1	3	OD	1	2	1								SEM	0.138484	0.320481	0.225364
Std Error	0.123254	Prob > t		<.0001		1	3	OS	1	2	1								PostMRD1	3.36628	2.93	3.19231
Upper 95%	1.00455	Prob < t		1		1	6	OD	4										StDev	0.948603	0.748331	0.722797
Lower 95%	0.507077					1	6	OS	3.5										SEM	0.121456	0.149666	0.200468
N	43					1	7	OD	3.5	5	1.5							0.98	MeanDiff	1.71591	3.92308	3.5
Correlation	0.617077					1	7	OS	3.5	5	1.5								StDev	6.41845	4.56332	2.94174
	Pre MRD1	Post MRD1				1	9	OD	2.5	4	1.5								SEM	0.821798	0.912663	0.815892
Mean	2.61047	3.36628				1	9	OS	2.75	4	1.25
Std Dev	0.895263	0.948603				2	12	OS	1	2	1								N eyes	61	25	13	99
Std Err Mean	0.136526	0.144661				2	13	OD	3	2	-1								N complete eyes	43	25	13	81
Upper 95% Mean	2.88599	3.65822				3	13	OS	2.75	1	-1.75
Lower 95% Mean	2.33494	3.07434				1	14	OD	2	3.5	1.5								t-test	1.28176e-07	3.25813e-10	6.66676e-07
N	43	43				1	14	OS	2	3	1
						1	16	OD	3	5	2
						1	16	OS	2.75	4.5	1.75
Post MRD1	2.93	t-Ratio	9.85632		Ptosis Repair	1	17	OD	2	3	1
Pre MRD1	-0.15	DF	24			2	17	OS	1	3	2
Mean Difference	3.08	Prob > |t|		<.0001		1	22	OD	2.5	4	1.5
Std Error	0.31249	Prob > t		<.0001		1	22	OS	2.5	4	1.5
Upper 95%	3.72495	Prob < t		1		1	25	OD	2.5	3.5	1
Lower 95%	2.43505					1	25	OS	3	3.5	0.5
N	25					3	27	OD	2
Correlation	0.286231					3	27	OS	1
	Pre MRD1	Post MRD1				3	30	OD	3
Mean	-0.15	2.93				3	30	OS	2
Std Dev	1.60241	0.748331				2	33	OD	2	2	0
Std Err Mean	0.320481	0.149666				2	33	OS	2	2	0
Upper 95% Mean	0.511441	3.2389				1	36	OD	4	4	0
Lower 95% Mean	-0.811441	2.6211				1	36	OS	4	4	0
N	25	25				1	38	OD	0.5
						1	38	OS	1
						1	41	OD	2.5	3	0.5
Post MRD1	3.19231	t-Ratio	8.84029		Both	1	41	OS	2.5	3	0.5
Pre MRD1	0.423077	DF	12			2	48	OD	1.5	2	0.5
Mean Difference	2.76923	Prob > |t|		<.0001		2	48	OS	1	3	2
Std Error	0.313251	Prob > t		<.0001		2	52	OD	3	3	0
Upper 95%	3.45175	Prob < t		1		1	52	OS	3	2.75	-0.25
Lower 95%	2.08672					1	71	OD	0.5
N	13					2	71	OS	0
Correlation	-0.0791299					1	92	OD	4	4	0
	Pre MRD1	Post MRD1				1	92	OS	4	4	0
Mean	0.423077	3.19231				2	117	OD	2	3.5	1.5
Std Dev	0.812562	0.722797				2	117	OS	2.5	3.5	1
Std Err Mean	0.225364	0.200468				1	123	OD	3
Upper 95% Mean	0.914103	3.62909				1	123	OS	3
Lower 95% Mean	-0.0679492	2.75553				1	126	OD	3
N	13	13				1	126	OS	3
						2	127	OD	2.5	3	0.5
						2	127	OS	1.5	2	0.5
						2	132	OD	0
						2	132	OS	0
						1	133	OD	3	4	1
						1	133	OS	4.5	4	-0.5
						2	138	OD	3	4	1
						2	138	OS	2.5	4	1.5
						3	140	OD	3.5	4	0.5
						3	140	OS	3.5	4	0.5
						1	143	OD	2
						1	143	OS	2
						1	11	OD				0.5	4	3.5
						1	11	OS				0.5	4.5	4
						1	15	OD				0.25	3	2.75
						1	20	OD				0.25	4	3.75
						1	20	OS				0	4	4
						1	28	OD				0.5	3	2.5
						2	28	OS				-1	3	4
						2	29	OD				0.5	4	3.5
						3	31	OD				0	2	2
						3	34	OD				0	2.5	2.5
						2	34	OS				0.5	3	2.5
						2	39	OD				2	2	0
						1	39	OS				0	1.5	1.5
						1	40	OD				2	3	1
						2	40	OS				0.75	3	2.25
						3	42	OD				-1	3	4
						3	42	OS				-1	3	4
						1	99	OD				-3	2.5	5.5
						1	99	OS				-4	2.5	6.5
						1	113	OD				0.5	2.5	2
						1	113	OS				1	2.5	1.5
						1	120	OD				1	3.5	2.5
						1	134	OS				2	3	1
						1	146	OD				-3	2	5
						1	146	OS				-3	2.25	5.25
						1	12	OD							-2	3	5
						1	18	OD							1	3.5	2.5
						2	18	OS							1	3.5	2.5
						1	19	OD							0.5	3	2.5
						1	19	OS							0.5	3	2.5
						1	43	OD							1	4	3
						1	43	OS							0	4.5	4.5
						1	100	OD							0.5	3	2.5
						1	100	OS							0.5	3	2.5
						2	121	OD							1	2	1
						2	121	OS							1	2	1
						3	152	OD							0.5	4	3.5
						3	152	OS							0	3	3
							0	0
							#REF!	51
							#REF!	48
							0	0
							0	0
											43			25			13
																			81

## Sheet: Table
Study ID#	Pre MRD1	Post MRD1	Pre Pt Vertical Degrees	Pre Deg Area SVF	Pre Taped Vertical Degrees	Pre Taped Deg Area SVF	Post Vertical Degrees	Post Deg Area SVF	Comments	Surgery done (1=BLEPH, 2=PTOSIS, 3=both)
1	3	4	17.1	385	28.9	1210	25.2	1044		1
1	3	4	13.9	353	27.9	1141	25.2	1094		1		Surgery group	Blepharoplasty	Column1	Ptosis Repair	Column2	Both	Column3
3	1	2	14.6	322	25	898	13.6	450	later had brow lift	1			Preop	Postop	Preop	Postop	Preop	Postop
3	1	2	13.8	308	22.5	804	10.5	353	later had brow lift	1		Mean MRD1 (mm)	2.38934	3.36628	-0.15	2.93	0.423077	3.19231
6	4		8.5	233	25.9	988	4.3	45		1		Mean VertSVF (deg)	7.82459	20.9295	8.088	21.916	8.42308	23.9154
6	3.5		11.5	288	25.9	978	8.3	143		1		Mean SVFArea (deg2)	222.934	797.885	201.68	842.96	261.769	968.615
7	3.5	5	11.8	456	24.6	903	28.3	1106		1
7	3.5	5	13.2	596	24.6	924	27.5	1128		1
9	2.5	4	3	66	26.3	968	25.4	987		1
9	2.75	4	2.6	100	25.2	981	25.4	995		1
12	1	2	8.5	259	21.5	864	5.7	201	Hering's	1
13	3	2	11.1	350	20.4	813	24.6	952		1
13	2.75	1	9.2	298	23.5	910	24.6	961		1
14	2	3.5	15.9	579	26.7	1120	19.6	600		1
14	2	3	13	455	24.8	1039	20	605		1
16	3	5	10.7	355	22.8	880	23.9	841		1
16	2.75	4.5	13.2	355	24	936	22.1	740		1
17	2	3	2.1	89	24.1	901	23.1	818		1
17	1	3	3.8	77	22.8	846	22.1	771		1
22	2.5	4	8.9	159	25	960	14.3	589		1
22	2.5	4	10.7	175	18.2	577	16.8	781		1
25	2.5	3.5	8	248	21.2	842	21.2	892		1
25	3	3.5	1.6	51	20.8	837	21.6	939		1
27	2		11.9	373	24.4	975	25.2	962		1
27	1		4.1	207	24.1	940	24.8	941		1
30	3		16.3	398	26.7	1018	20.6	780		1
30	2		13.7	373	24.4	952	24.6	932		1
33	2	2	2.5	54	22.1	757	17.7	603		1
33	2	2	6.7	168	21.3	872	23.9	937		1
36	4	4	2.7	147	21.5	924	22.6	846		1
36	4	4	7.3	144	23.8	966	23	819		1
38	0.5		4.1	116	25.9	1040	21.3	627		1
38	1		2.8	61	25.5	1031	23	777		1
41	2.5	3	4.8	216	24.1	950	24	956		1
41	2.5	3	6.7	275	24.1	961	5.3	112		1
48	1.5	2	5	110	27.3	1066	17.1	753		1
48	1	3	9	233	25.7	992	22.9	1021		1
52	3	3	0.6	6	22.6	793	17.6	598		1
52	3	2.75	0.6	9	22.9	805	17.4	620		1
71	0.5		6.3	123	24.6	1049	22.2	859		1
71	0		6	167	24.9	1028	23.4	872		1
92	4	4	12.6	336	21.4	926	19.7	654		1
92	4	4	14.6	452	25.1	1013	22.3	704		1
117	2	3.5	10	246	25.3	1038	28.6	1286		1
117	2.5	3.5	11.1	255	25.1	1025	26.8	1310		1
123	3		7.5	222	24.5	1004	17.9	597		1
123	3		12.6	387	25.7	1041	14.5	494		1
126	3		12.7	449	25.2	990	12.2	332		1
126	3		12.8	356	24	995	17.8	442		1
127	2.5	3	5	176	23.9	1061	24.5	891		1
127	1.5	2	5	135	25	1048	23.8	1000		1
132	0		1	1	25.3	1030	17.9	856		1
132	0		3.3	149	25.1	1052	20.3	889		1
133	3	4	1.7	13	25.6	964	24.8	951		1
133	4.5	4	2.3	20	24.9	944	25.6	974		1
138	3	4	9.5	207	24.8	916	22.2	859		1
138	2.5	4	2	16	25.5	1000	25.7	1000		1
140	3.5	4	3.4	36	13.1	285	18.8	881		1
140	3.5	4	6.7	91	17.3	520	23.1	959		1
143	2		3.5	240	22.2	887	31.5	1343		1
143	2		2.2	75	23.5	942	28.8	1199		1
11	0.5	4	6.9	90	20.8	708	26.1	1017		2		Correlations
11	0.5	4.5	8.9	132	23.3	807	24.3	932		2			Pre MRD1:VertSVF	Pre MRD1:SVFArea
15	0.25	3	8.5	276	26.3	994	24.1	777		2		Bleph (1)	0.199561	0.19696
20	0.25	4	12.2	249	24.4	845	24.6	893		2		Ptosis (2)	0.617827	0.617
20	0	4	14.4	309	24.8	942	24.2	892		2		Both (3)	0.649635	0.4781
28	0.5	3	18.1	458	25.2	876	25.7	971		2
28	-1	3	7.4	305	24.8	1025	26	1007		2		ptosis
29	0.5	4	12.5	262	23.9	892	24.1	906	OD only w orbic bx	2		ave preMRD1	-0.15	ave preVert	8.088	ave preArea	201.68
31	0	2	5.6	137	17	708	21.8	874	OD only	2		ave post MRD1	2.93	ave post Vert	22.664	ave postArea	878.88
34	0	2.5	7.9	283	21.5	824	16.8	781		2
34	0.5	3	8.2	181	20.8	834	20.6	882		2		both
39	2	2	2.5	136	22.1	946	10.3	298		2		ave preMRD1	0.423077	ave preVert	8.42308	ave preArea	261.769
39	0	1.5	1.4	48	22.9	1042	10.3	146		2		ave post MRD1	3.19231	ave post Vert	22.2333	ave postArea	861.75
40	2	3	11.5	287	22.2	789	24.4	954		2
40	0.75	3	11.1	321	21.5	912	24.8	959		2
42	-1	3	4.8	99	20	917	23.3	991		2
42	-1	3	7.2	99	20	968	22.1	974		2
99	-3	2.5	1.4	9	23.7	941	22	850		2
99	-4	2.5	1.7	11	23.7	906	20.8	718		2
113	0.5	2.5	12.4	425	22.7	908	23.3	946		2
113	1	2.5	9.6	380	22.9	937	13.8	340	mistake on TVF?	2
120	1	3.5	9.5	214	27.2	1035	25.2	901		2
134	2	3	14.2	271	18.4	502	23.8	1067		2
146	-3	2	2.3	19	23.9	846	20.9	961		2
146	-3	2.25	2	41	22.6	868	24.6	1037		2
12	-2	3	0.4	13	20	826	20.7	688	RUL ptosis BULB	3
18	1	3.5	7.9	151	19.6	624	23	691		3
18	1	3.5	7.5	106	22.9	702	24.3	876		3
19	0.5	3	13.3	292	25.6	950	27.1	1196		3
19	0.5	3	11.9	230	25.9	997	27.1	1123		3
43	1	4	20	929			31	1504	previous RUL repair, after LUL repair, herings on right	3
43	0	4.5	3.7	158	25.3	1042	31	1531		3
100	0.5	3	6.9	174	22.4	932	22.9	895		3
100	0.5	3	8.4	333	22.2	923	23.1	903		3
121	1	2	10	406	24.4	1057	22.2	872		3
121	1	2	10	305	24.9	1061	14.4	581		3
152	0.5	4	8.7	256	19.4	708	21.7	883		3
152	0	3	0.8	50	14.2	519	22.4	849		3
